# Supplementary material for: An in situ approach to preparing Ni2P/SiO2 catalyst under mild conditions and its performance for the deoxygenation of methyl laurate to hydrocarbons
Source: Royal Society of Chemistry journal article supplement (doi:10.1039/c5cy01751c), 2016-01-01
Supplement: c5cy01751c1.pdf [file c5cy01751c1.pdf]

Supplementary information for

**An in-situ approach to preparing Ni<sub>2</sub>P/SiO<sub>2</sub> catalyst under mild condition and its performance for the deoxygenation of methyl laurate as a model compound to hydrocarbons**

Jixiang Chen\*, Mengmeng Han, Sha Zhao, Zhengyi Pan, Zhen Zhang

**Preparation of Ni<sub>3</sub>P/SiO<sub>2</sub>-TPR, Ni<sub>12</sub>P<sub>5</sub>/SiO<sub>2</sub>-TPR and Ni<sub>2</sub>P/SiO<sub>2</sub>-TPR**

Silica was incipiently impregnated with a mixture aqueous solution of NH<sub>4</sub>H<sub>2</sub>PO<sub>4</sub> and Ni(NO<sub>3</sub>)<sub>2</sub>, followed by drying at 120 °C for 12 h and calcination at 550 °C for 4 h to produce the catalyst precursor, where the nominal Ni/P ratio was 3.0, 2.0 or 1.0. Secondly, the catalyst was prepared by the TPR process from the precursor as the following program: heating from room temperature to 250 °C at 10 °C /min and from 523 to 923 °C at 1 °C /min, maintaining at 923 °C for 3 h and then cooling to room temperature. The H<sub>2</sub> (>99.9%) flow was set as 320 ml/min per gram of precursor. Ni<sub>3</sub>P/SiO<sub>2</sub>-TPR, Ni<sub>12</sub>P<sub>5</sub>/SiO<sub>2</sub>-TPR and Ni<sub>2</sub>P/SiO<sub>2</sub>-TPR were prepared from the precursors with the Ni/P ratios of 3.0, 2.0 and 1.0, respectively. To avoid the drastic oxidation, the prepared catalysts were passivated in a 0.5%(vol)O<sub>2</sub>/N<sub>2</sub> flow for 4 h before exposure to air.

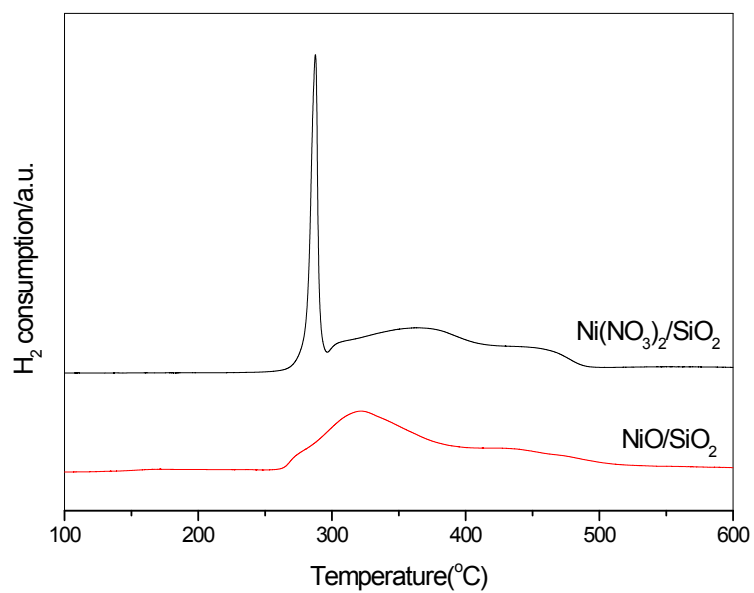

Figure 1S H<sub>2</sub>-TPR profiles of NiO/SiO<sub>2</sub> or Ni(NO<sub>3</sub>)<sub>2</sub>/SiO<sub>2</sub>

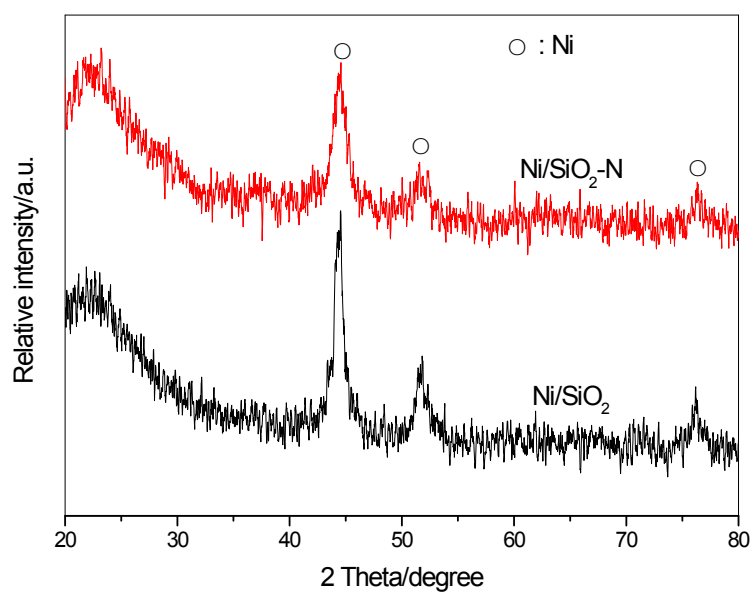

Figure 2S XRD patterns of Ni/SiO<sub>2</sub> and Ni/SiO<sub>2</sub>-N

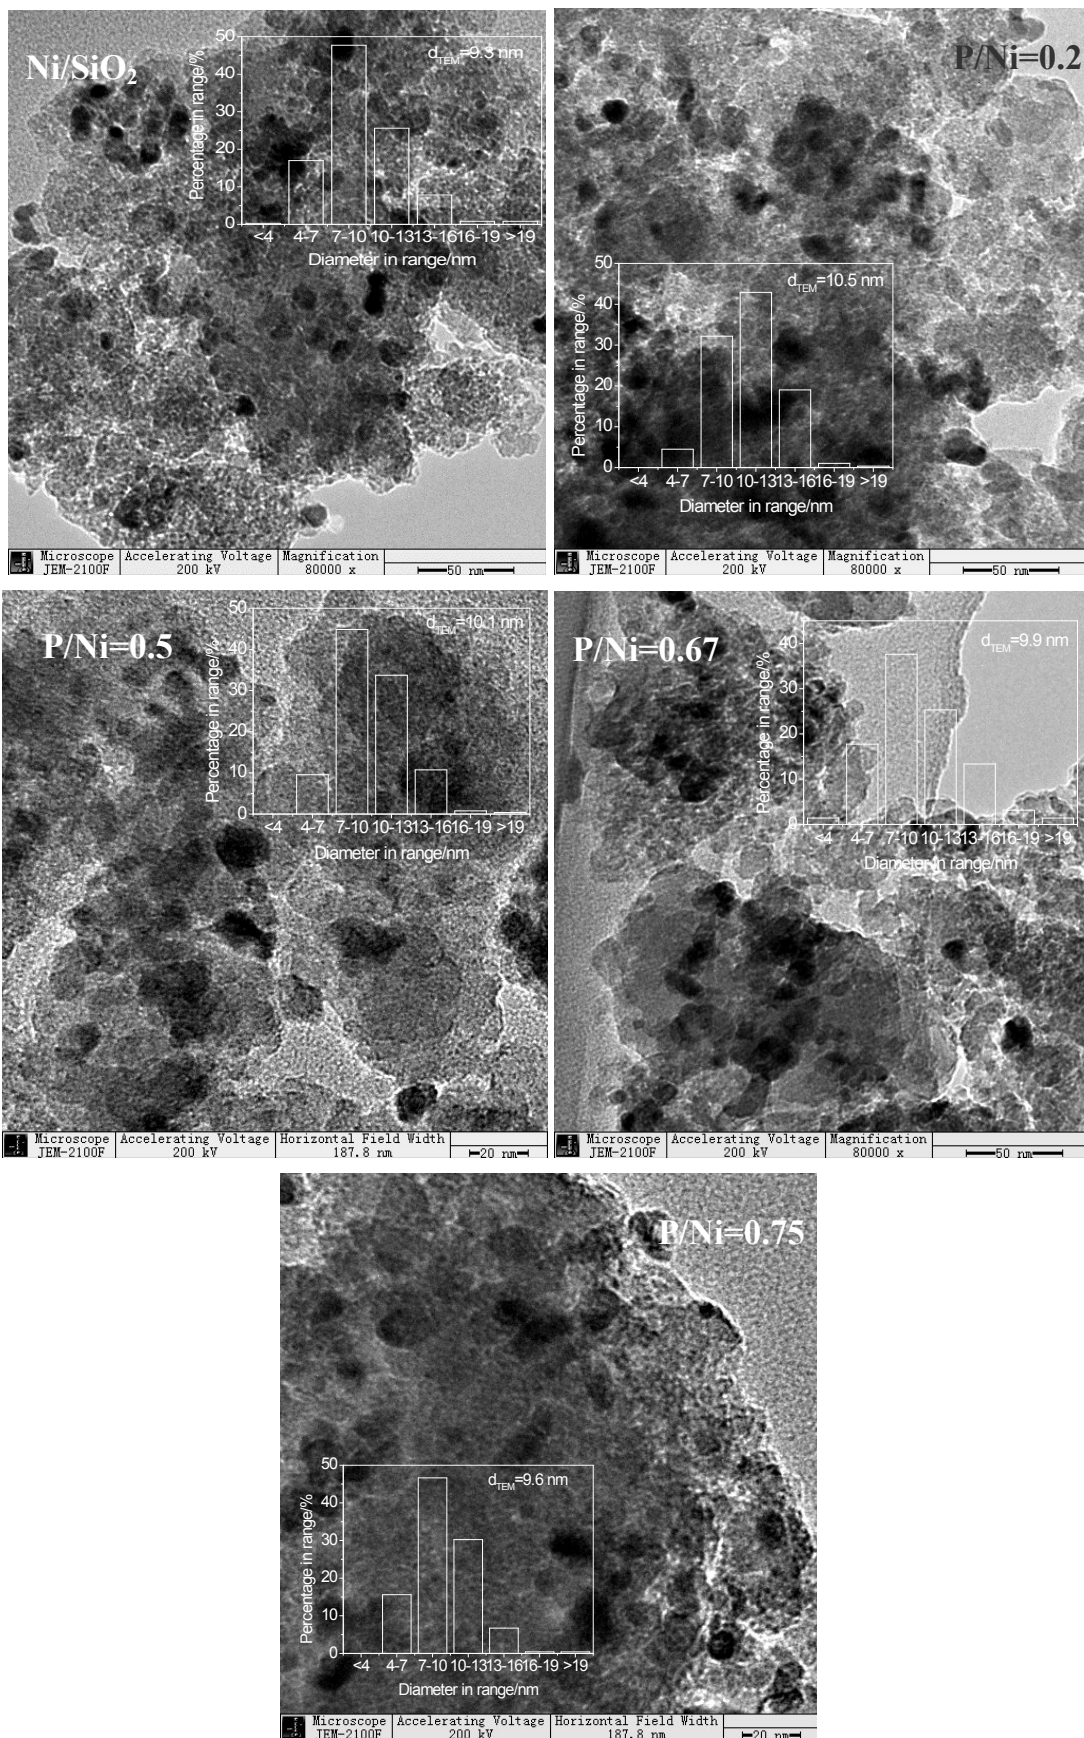

Figure 3S TEM images of Ni/SiO<sub>2</sub> and the SiO<sub>2</sub>-supported nickel phosphides prepared at different nominal P/Ni ratios

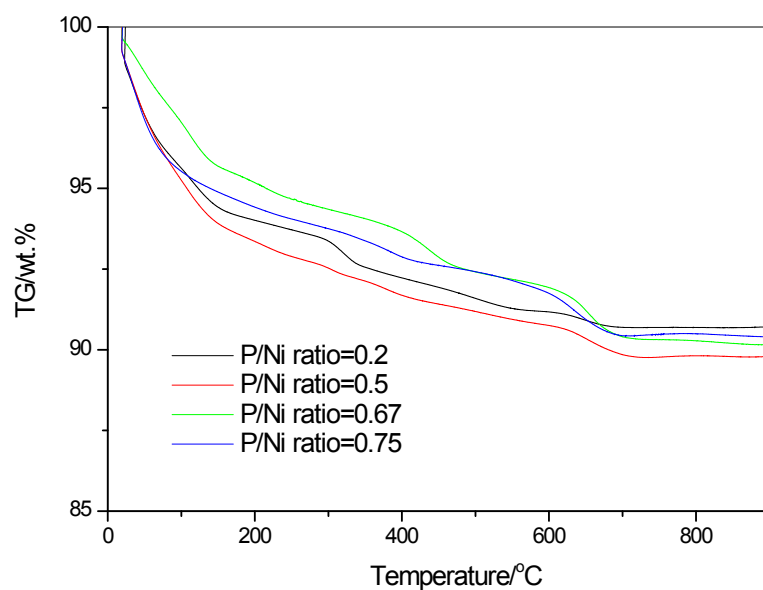

Figure 4S TG profiles of the SiO<sub>2</sub>-supported nickel phosphides prepared with different nominal P/Ni ratios at 400 °C

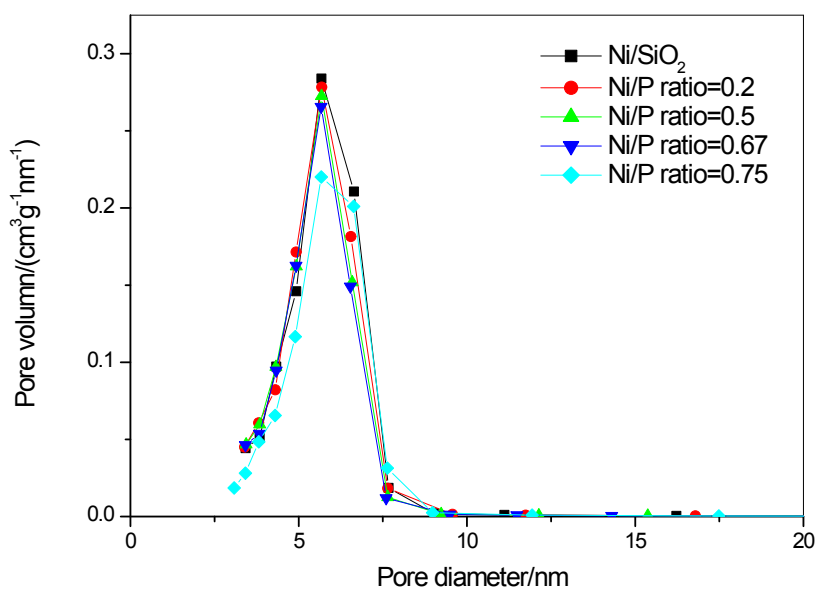

Figure 5S BJH pore size distributions of Ni/SiO<sub>2</sub> and SiO<sub>2</sub>-supported nickel phosphides prepared at different nominal P/Ni ratios. Other condition: 400 °C, WHSV of TPP = 0.5 h<sup>-1</sup>, H<sub>2</sub> flow

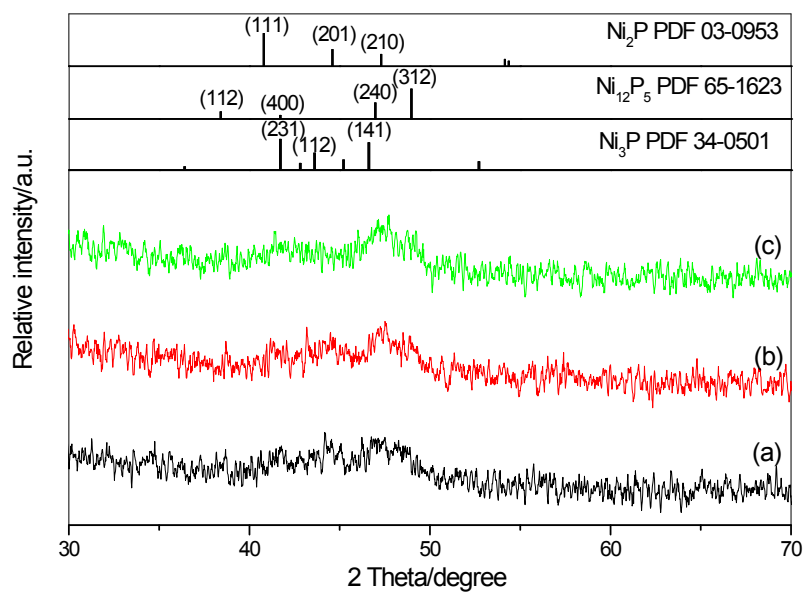

Figure 6S XRD patterns of the phosphorized samples at 200 °C with P/Ni ratio of (a) 0.75; (b) 1.0 and (c) 1.5

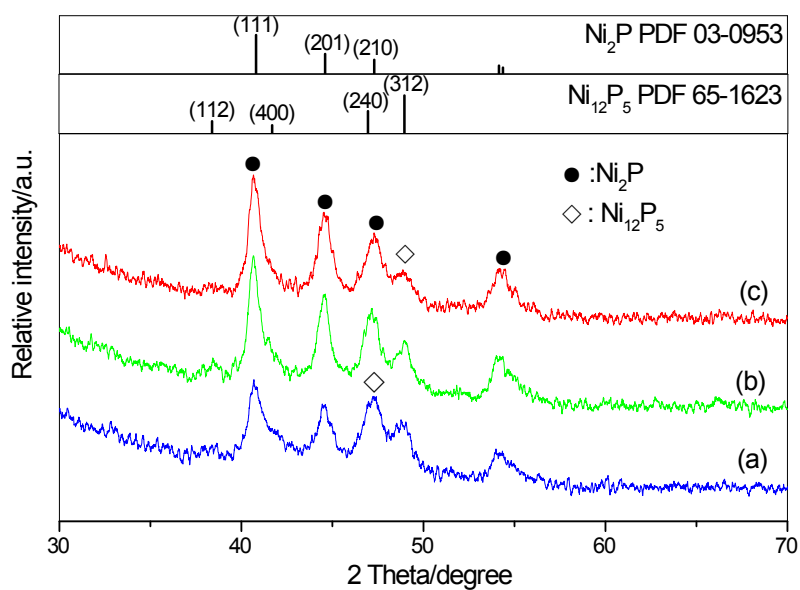

Figure 7S XRD patterns of (a) Ni/SiO<sub>2</sub>-P150-300; (b) Ni/SiO<sub>2</sub>-P200-300 and (c) Ni/SiO<sub>2</sub>-P225-300

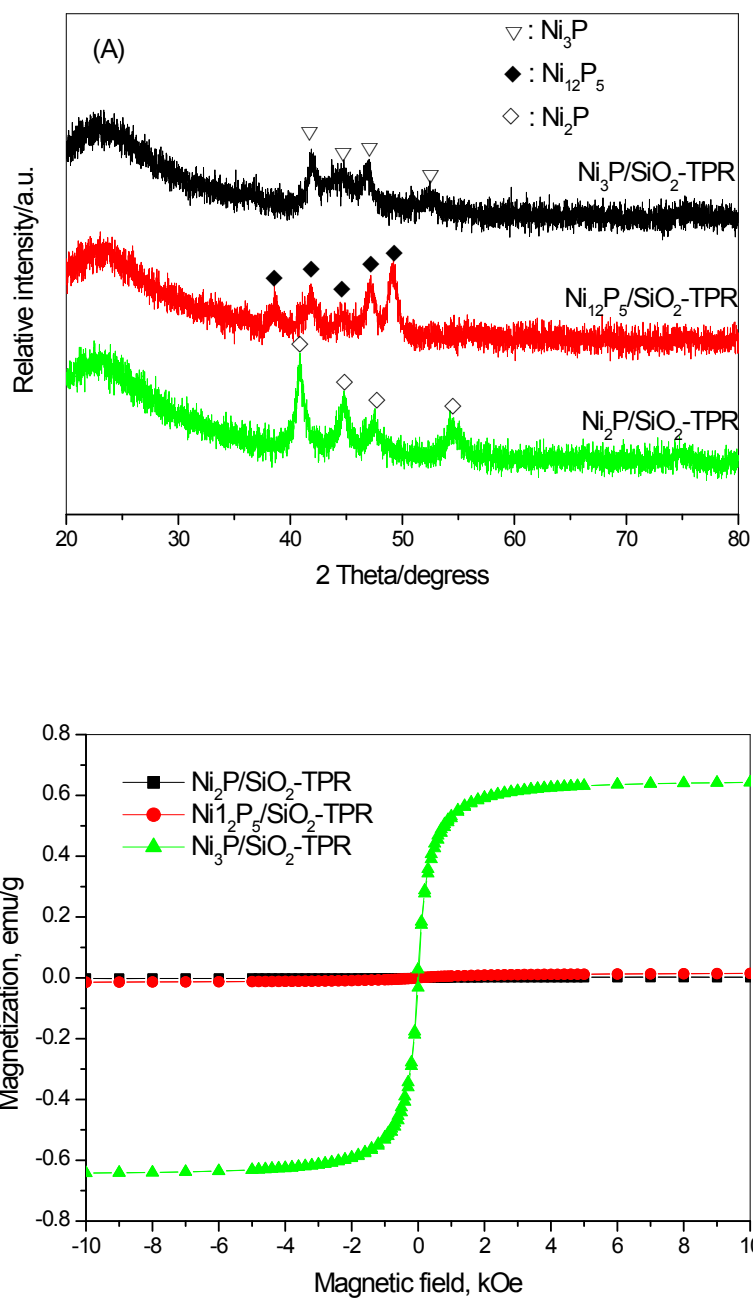

Figure 8S XRD patterns (A) and magnetic hysteresis loops at room temperature (B) of  $\text{Ni}_3\text{P}/\text{SiO}_2\text{-TPR}$ ,  $\text{Ni}_{12}\text{P}_5/\text{SiO}_2\text{-TPR}$  and  $\text{Ni}_2\text{P}/\text{SiO}_2\text{-TPR}$

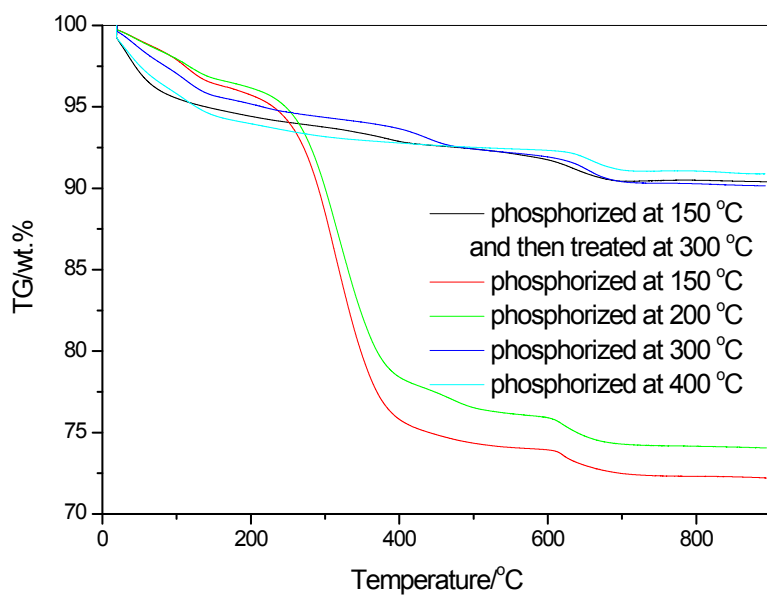

Figure 9S TGA profiles of samples phosphorized at different temperatures

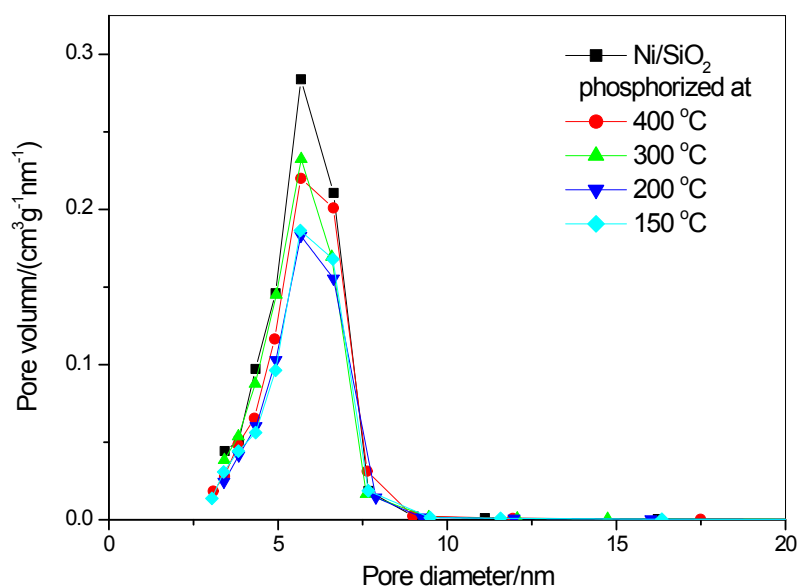

Figure 10S Pore size distributions of Ni/SiO<sub>2</sub> and SiO<sub>2</sub>-supported nickel phosphides prepared at different temperatures. Other condition: nominal P/Ni ratio = 0.75, WHSV of TPP = 0.5 h<sup>-1</sup>, H<sub>2</sub> flow.

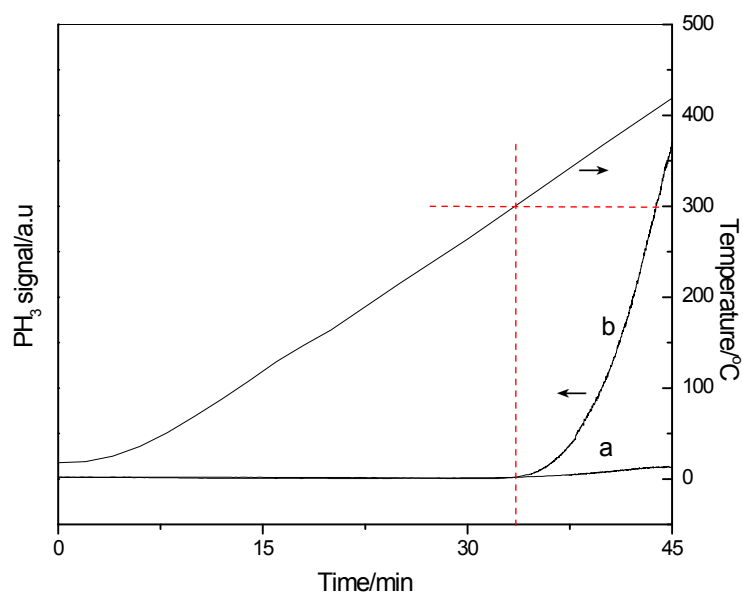

Figure 11S  $\text{PH}_3$  (mass=34) signal during the hydrogenolysis of TPP on (a)  $\text{SiO}_2$  and (b)  $\text{Ni/SiO}_2$

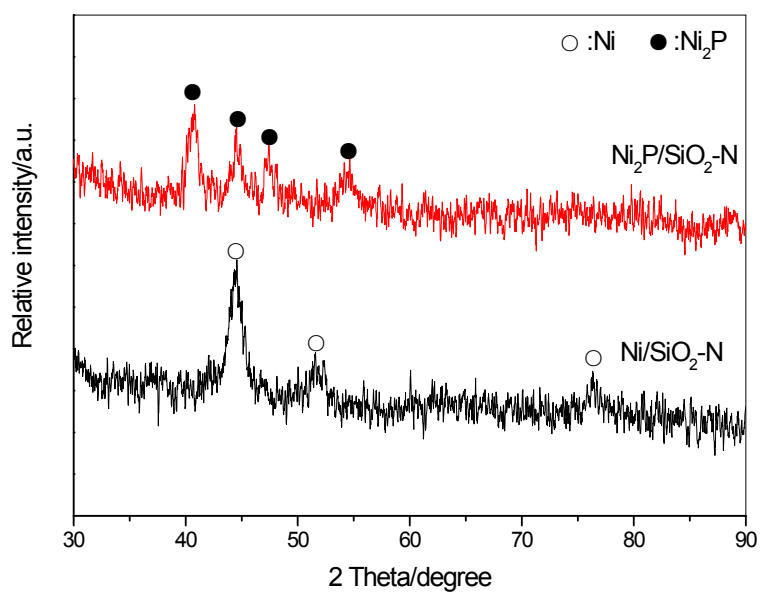

Figure 12S XRD patterns of  $\text{Ni/SiO}_2\text{-N}$  and  $\text{Ni}_2\text{P/SiO}_2\text{-N}$



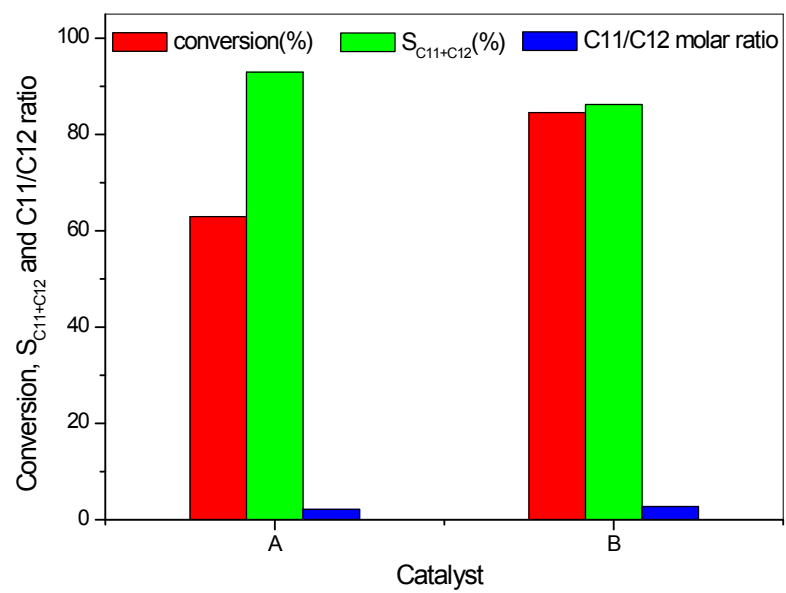

Figure 13S Comparison of performance of (A) Ni<sub>2</sub>P/SiO<sub>2</sub> and (B) Ni<sub>2</sub>P/SiO<sub>2</sub> -N
